# Supplementary material for: The Two Isoforms of Lyn Display Different Intramolecular Fuzzy Complexes with the SH3 Domain
Source: MDPI journal article supplement (doi:10.3390/molecules23112731), 2018-10-23
Supplement: s1 [file s1]

*SUPPLEMENTARY MATERIAL***The two isoforms of Lyn display different intramolecular fuzzy complexes with the SH3 domain**

**João M.C. Teixeira<sup>1</sup>, Héctor Fuentes<sup>1</sup>, Stase Bielskute<sup>2</sup>, Margarida Gairi<sup>3</sup>, Szymon Żerko<sup>4</sup>, Wiktor Koźmiński<sup>4</sup> and Miquel Pons<sup>1\*</sup>**

<sup>1</sup> BioNMR Laboratory, Inorganic and Organic Chemistry Department, Universitat de Barcelona

<sup>2</sup> Institute of Chemical Physics, Vilnius University, Saulėtekio al.3, Vilnius 10257, Lithuania

<sup>3</sup> Unitat de RMN d'Alt, Centres Científic-Tecnològics de la Universitat de Barcelona

<sup>4</sup> Faculty of Chemistry, Biological and Chemical Research Centre, University of Warsaw

\* Correspondence: [mpons@ub.edu](mailto:mpons@ub.edu); Tel.: +34934034683

*SUPPLEMENTARY MATERIAL*



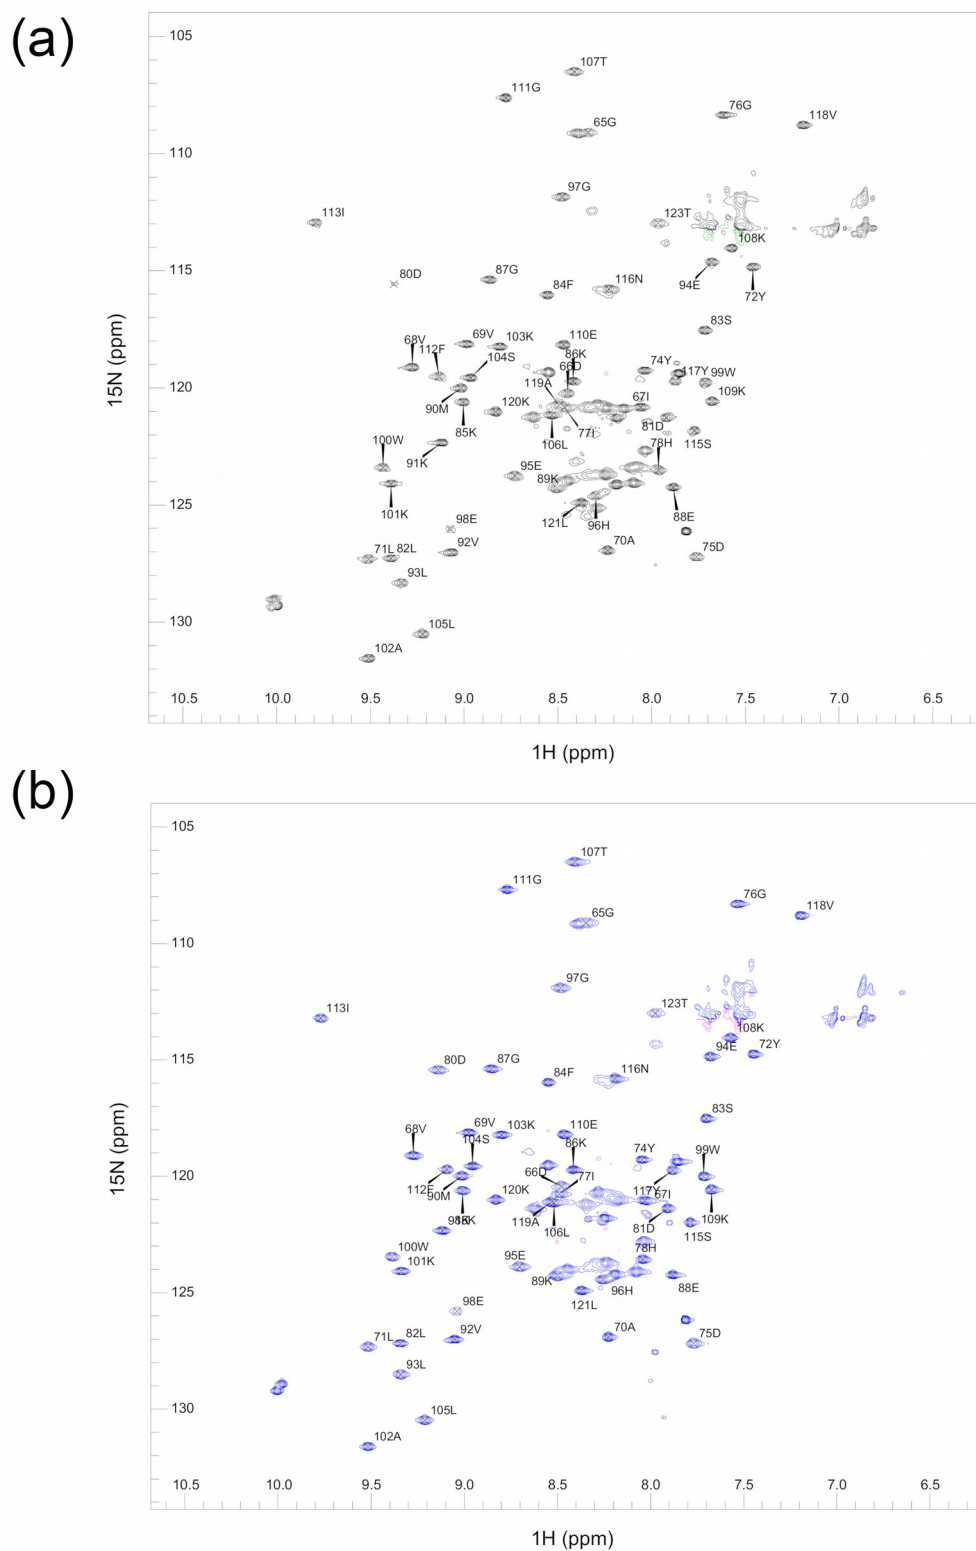

**Supplementary Figure 2:**  $^1\text{H}$ - $^{15}\text{N}$  BEST-TROSY NMR experiments of (a) LynA USH3 and (b) LynB USH3; at 298K. Only residues of the SH3 domain are labelled.

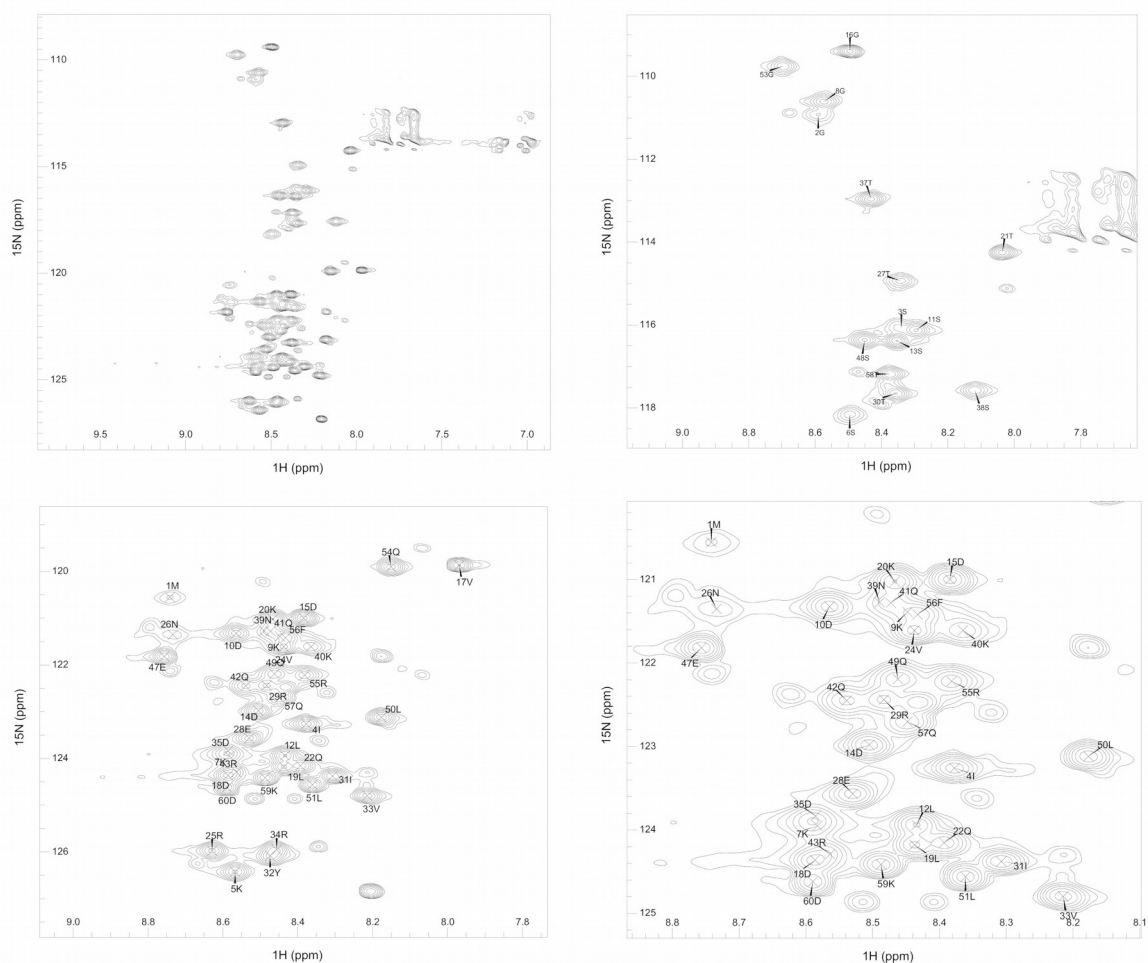

**Supplementary Figure 3:**  $^1\text{H}$ - $^{15}\text{N}$  BEST-TROSY NMR experiments of Lyn A SH4-Unque Domain isolated construct at 278K. Consecutive zooms amplify the details in the spectra; peaks are labeled according to the obtained assigned.

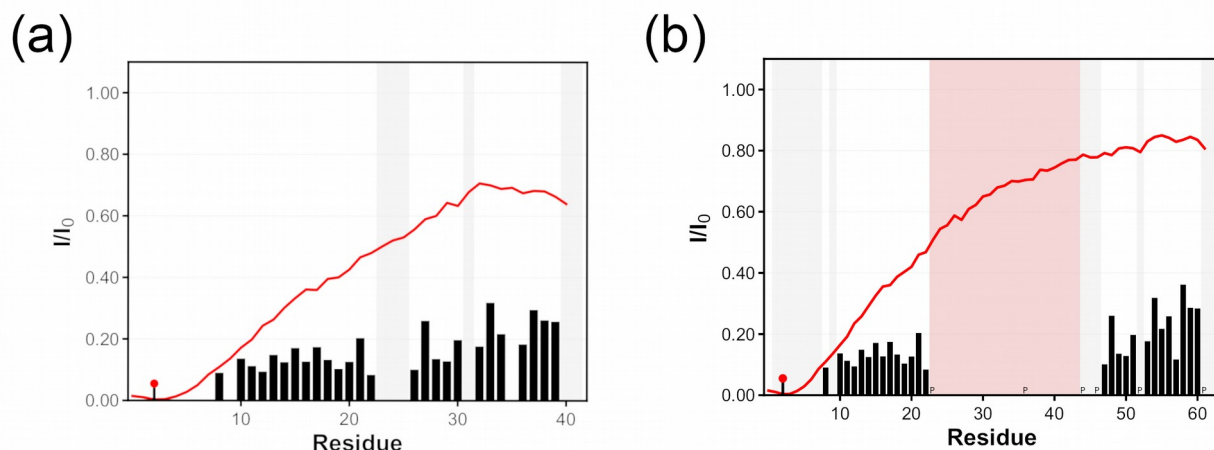

**Supplementary Figure 4:** PRE effects observed within the Lyn SH4-Unique domains for the USH3 construct. **(a)** for LynB with representation of the theoretical PRE profile considering a random coil model. **(b)** for LynB but with the residue numeration equal to LynA – red shade denotes the residues missing in LynB with respect to LynA; the red line denotes the theoretical PRE profile as calculated for LynA considering a random coil model.
